# Supplementary material for: Targeting Hypoxia Sensitizes TNBC to Cisplatin and Promotes Inhibition of Both Bulk and Cancer Stem Cells
Source: Preprints.org preprint supplement (doi:10.20944/preprints202007.0527.v1), 2020-07-22

Supplemental Figure 1

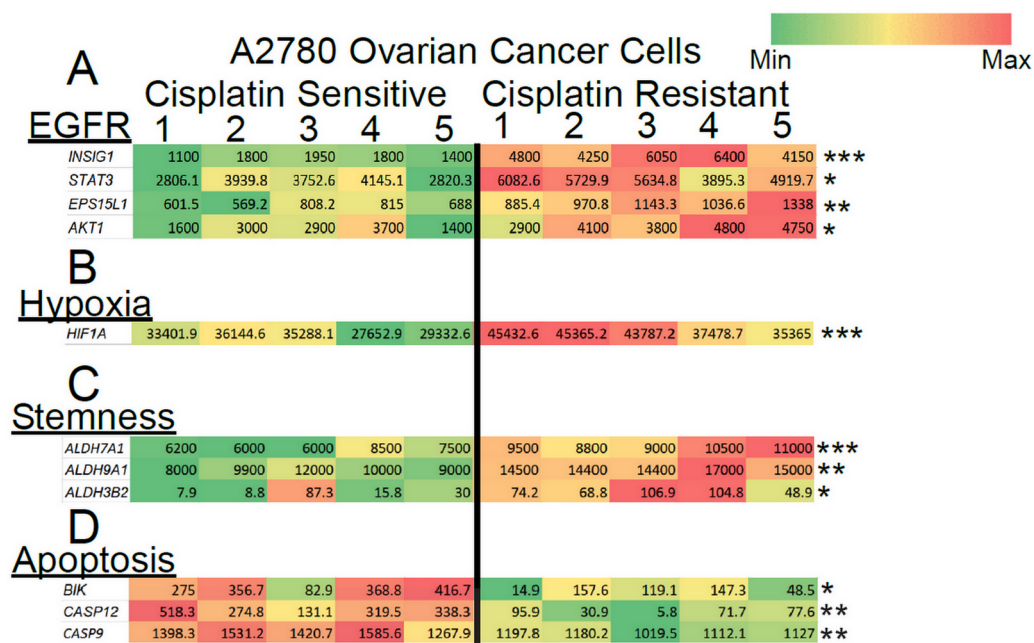

Supplemental Figure 2

SUM 149-PT TNBC Cells

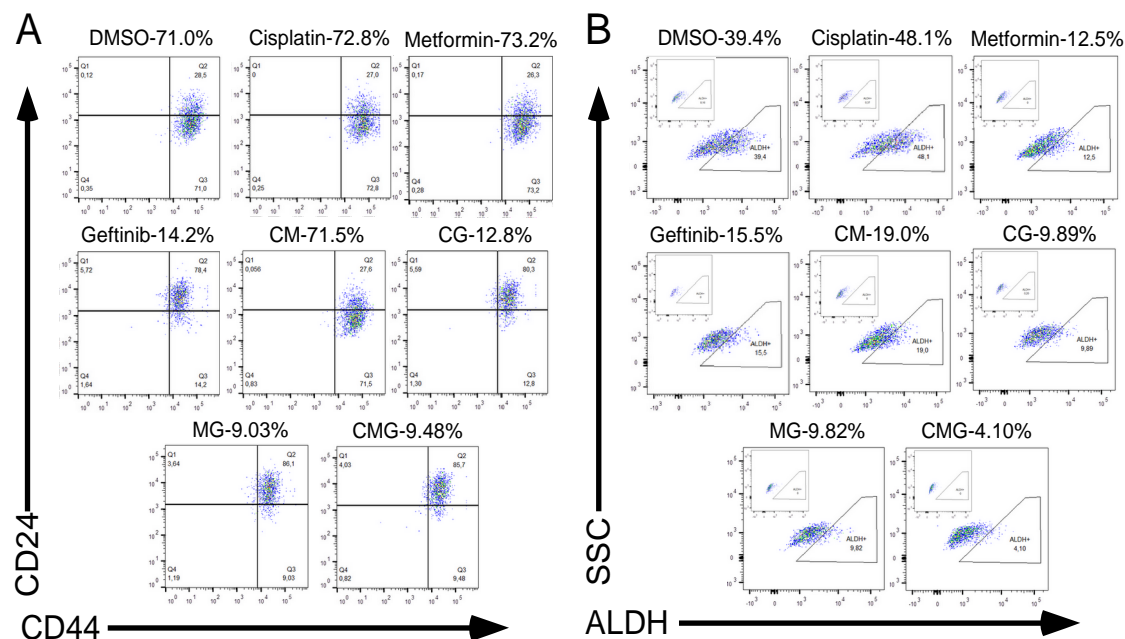

# Supplemental Figure 3

## TNBC Patient Tumors vs. TNBC Cell Lines

A

EGFR

*EGFR*

$p=1.07 \times 10^{-10}$

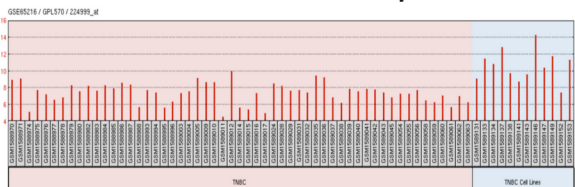

*MAP2K7*

$p=3.48 \times 10^{-13}$

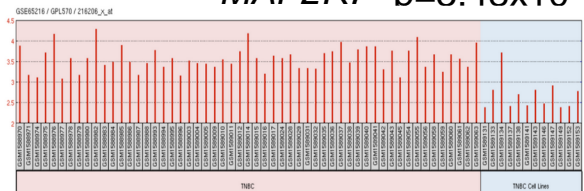

B

Apoptosis

*MCL1*

$p=2.95 \times 10^{-05}$

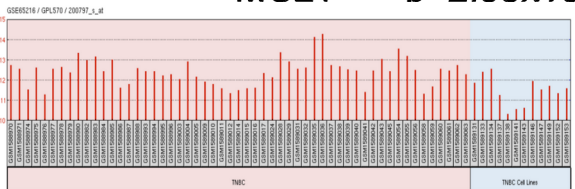

C

Hypoxia

*HIF1A*

$p=5.51 \times 10^{-07}$

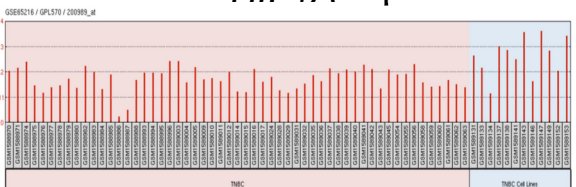

*VEGFA*

$p=1.69 \times 10^{-02}$

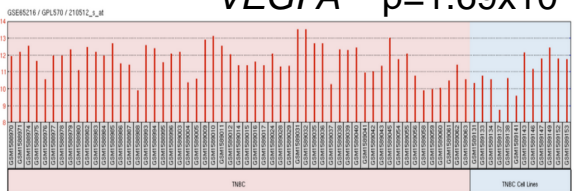

*ALDH2*

$p=2.09 \times 10^{-05}$

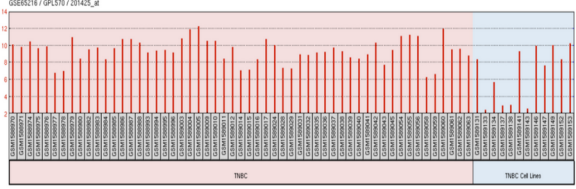

Supplement: Supplementary file 1 [file supplementary]
